# Supplementary material
Source: PubMed Central journal article supplement (PMC4967559)
Supplement: NIHMS777161-supplement-Supplement.pdf [file NIHMS777161-supplement-Supplement.pdf]

Table S1: Mean scores on subjective health measures by age group in pooled sample and mixed effects models effects of age and sex.

|                                                       | N         |             | Twin Pairs    |               | Mean (SD) |       | Mixed effects models:<br>effects of age and sex                    |
|-------------------------------------------------------|-----------|-------------|---------------|---------------|-----------|-------|--------------------------------------------------------------------|
|                                                       | Men/Women | MZ/DZ/OSDZ  | Men           | Women         | Men       | Women |                                                                    |
| <u>Self-Rated Health (SRH)</u>                        |           |             |               |               |           |       | Sex: F (1,4638)= 27.14, p<.0001<br>Age: F (1,4638)=166.97, p<.0001 |
| Middle age (Below50)                                  | 1208/1286 | 488/551/142 | 51.34 (9.25)  | 50.86 (9.83)  |           |       |                                                                    |
| Young-old (50-59)                                     | 1700/456  | 504/492/43  | 50.07 (10.00) | 49.50 (10.02) |           |       |                                                                    |
| Middle-old (60-69)                                    | 707/755   | 224/264/128 | 49.24 (9.89)  | 48.09 (10.51) |           |       |                                                                    |
| Old-old (70 or over)                                  | 2506/3677 | 636/924/276 | 50.38 (9.78)  | 49.27 (10.29) |           |       |                                                                    |
| <u>Extent to Which Health Limits Activities (ACT)</u> |           |             |               |               |           |       | Sex: F (1,4895)= 8.35, p=0.0049<br>Age: F (1,4895)= 23.54, p<.0001 |
| Middle age (Below50)                                  | 1238/1413 | 540/568/115 | 51.93 (8.67)  | 50.95 (9.47)  |           |       |                                                                    |
| Young-old (50-59)                                     | 1736/533  | 531/516/35  | 50.15 (9.81)  | 49.35 (10.36) |           |       |                                                                    |
| Middle-old (60-69)                                    | 856/955   | 325/332/126 | 49.23 (10.57) | 48.47 (10.78) |           |       |                                                                    |
| Old-old (70 or over)                                  | 2527/3679 | 645/923/275 | 50.37 (9.90)  | 49.14 (10.35) |           |       |                                                                    |
| <u>Health Compared to Others (COMP)</u>               |           |             |               |               |           |       | Sex: F (1,4881)= 35.81, p<.0001<br>Age: F (1,4881)=376.67, p<.0001 |
| Middle age (Below50)                                  | 1290/1458 | 563/591/140 | 50.32 (9.34)  | 49.08 (9.79)  |           |       |                                                                    |
| Young-old (50-59)                                     | 1739/540  | 524/518/43  | 49.99 (9.96)  | 49.69 (10.17) |           |       |                                                                    |
| Middle-old (60-69)                                    | 858/955   | 322/333/124 | 50.46 (10.24) | 50.42 (10.19) |           |       |                                                                    |
| Old-old (70 or over)                                  | 2505/3629 | 621/895/270 | 50.45 (10.01) | 49.88 (10.18) |           |       |                                                                    |

Note: MZ= Monozygotic, SSDZ=Same-sex Dizygotic, OSDZ=Opposite-sex Dizygotic



Table S2. Moderation effects and 95% confidence intervals from the best-fitting models

|                                                       | Linear Moderation Effects |                 |                |               | Quadratic Moderation Effects |                |               |                |
|-------------------------------------------------------|---------------------------|-----------------|----------------|---------------|------------------------------|----------------|---------------|----------------|
|                                                       | $\mu$                     | a               | c              | e             | $\mu$                        | a              | c             | e              |
| <u>Self-Rated Health (SRH)</u>                        |                           |                 |                |               |                              |                |               |                |
| Men                                                   | 3.79                      | -7.86           | -1.44          | -0.72         | -0.29                        | 0.60           | 0.24          | 0.04           |
|                                                       | (1.98; 5.61)              | (-10.00; 3.94)  | (-9.61; 10.00) | (-2.45; 1.03) | (-0.44; -0.14)               | (-0.12; 0.93)  | (-0.89; 0.86) | (-0.11; 0.19)  |
| Women                                                 | 1.24                      | -1.25           | -1.53          | 0.13          | -0.08                        | 0.11           | 0.12          | -0.02          |
|                                                       | (-0.51; 3.00)             | (-6.06; 3.10)   | (-9.19; 9.06)  | (-1.69; 2.02) | (-0.23; 0.06)                | (-0.25; 0.49)  | (-0.74; 0.76) | (-0.18; 0.13)  |
| <u>Extent to Which Health Limits Activities (ACT)</u> |                           |                 |                |               |                              |                |               |                |
| Men                                                   | 3.09                      | -7.73           | 2.88           | 0.08          | -0.22                        | 0.62           | -0.29         | 0.03           |
|                                                       | (1.58; 4.62)              | (-10.00; -3.44) | (-5.21; 7.93)  | (-1.34; 1.47) | (-0.35; -0.09)               | (0.26; 0.88)   | (-0.72; 0.46) | (-0.09; 0.15)  |
| Women                                                 | 2.71                      | 4.00            | 2.22           | 2.65          | -0.21                        | -0.48          | -0.20         | -0.21          |
|                                                       | (1.08; 4.34)              | (-0.20; 8.68)   | (-1.89; 6.92)  | (1.01; 4.21)  | (-0.34; -0.07)               | (-0.83; -0.14) | (-0.58; 0.16) | (-0.34; -0.07) |
| <u>Health Compared to Others (COMP)</u>               |                           |                 |                |               |                              |                |               |                |
| Men & Women                                           | -0.21                     | 0.07            | -0.73          | 0.24          | --                           | --             | --            | --             |
|                                                       | (-0.35; -0.06)            | (-0.47; 0.59)   | (-1.21; 1.21)  | (0.08; 0.39)  |                              |                |               |                |

$\mu$  = moderation effect on the mean; a = moderation effect on additive genetic influences; c = moderation effect on common/shared environmental influences; e = moderation effect on unique environmental influences.

\*2<sup>nd</sup> best fitting model.
